# Supplementary material for: Rank and payoff biases influence subject choices in a foraging task among sanctuary chimpanzees (Pan troglodytes)
Source: Research Square preprint supplement (doi:10.21203/rs.3.rs-8321136/v1), 2025-12-19

**Supplementary Material for: Rank and payoff biases influence subject choices in a foraging task among sanctuary chimpanzees (*Pan troglodytes*)**

**Supplementary Figure 1:** Control individual token choices showed no significant preference for black or blue


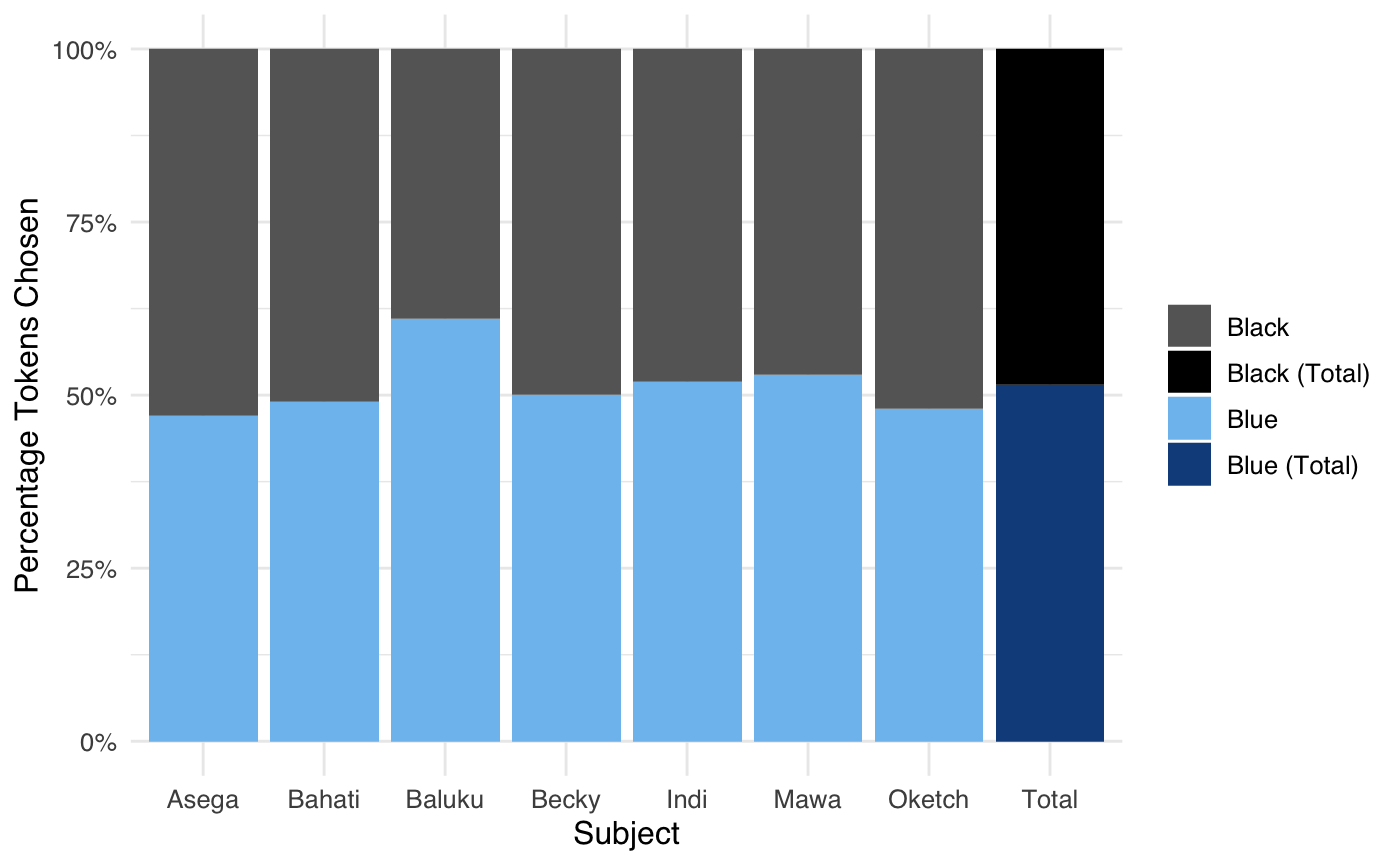


**Supplementary Figure 2:** Tokens stolen from each demonstrator


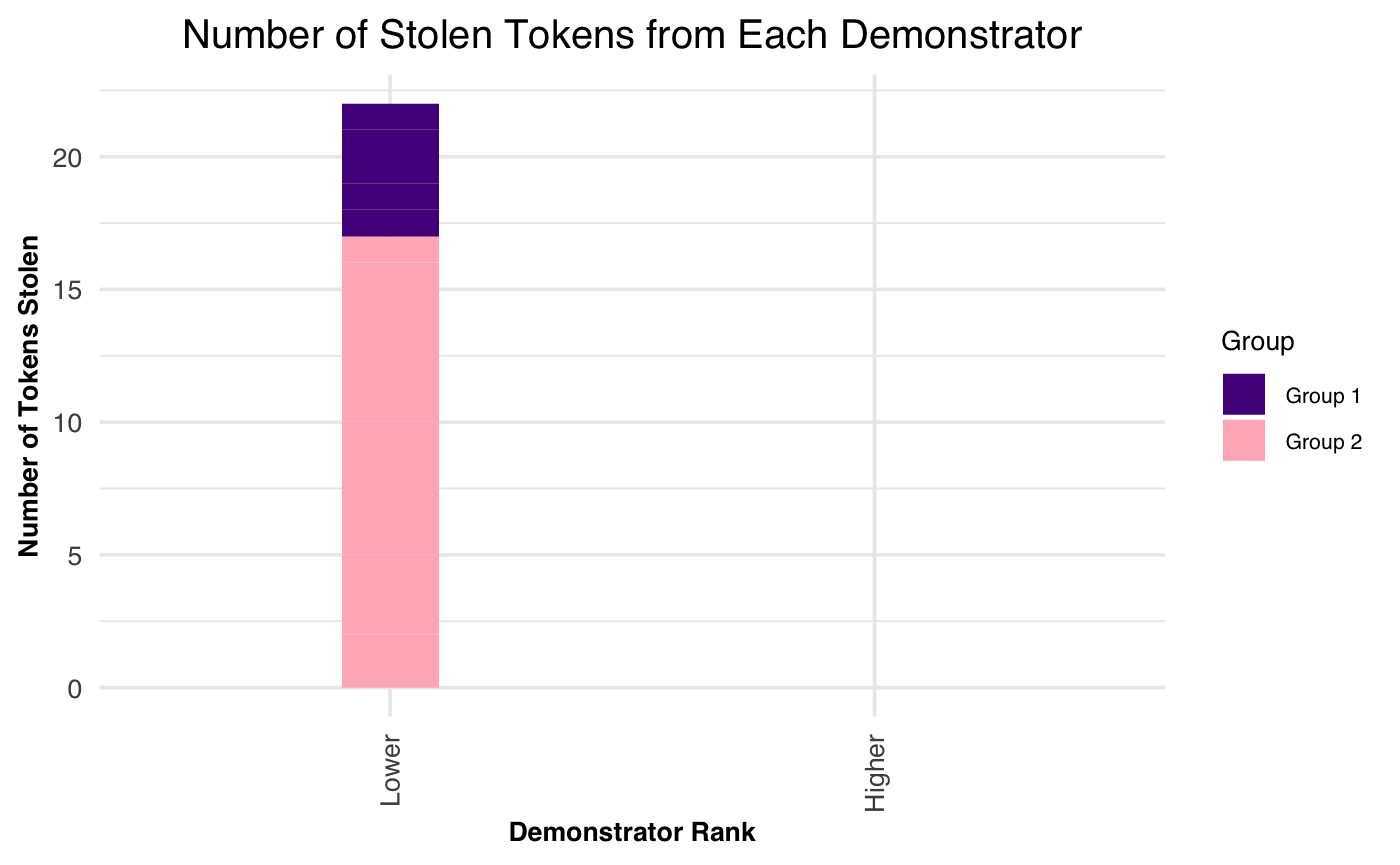

Supplement: Supplementary file 1 [file 879823f02427c3afd337cf03.docx]
